# Supplementary material for: Designing Efficient Low-Cost Paper-Based Sensing Plasmonic Nanoplatforms
Source: MDPI journal article supplement (doi:10.3390/s18093035), 2018-09-11
Supplement: s1 [file s1]

*Supplementary Information*

# Designing Efficient Low-Cost Paper-based Sensing Plasmonic Nanoplatforms

**Laurentiu Susu<sup>1,†</sup>, Andreea Campu<sup>1,2†</sup>, Ana Maria Craciun<sup>1</sup>, Adriana Vulpoi<sup>3</sup>, Simion Astilean<sup>1,2</sup> and Monica Focsan<sup>1,\*</sup>**

<sup>1</sup> Nanobiophotonics and Laser Microspectroscopy Center, Interdisciplinary Research Institute on Bio-Nano-Sciences, Babes-Bolyai University, Treboniu Laurean No. 42, Cluj-Napoca 400271, Romania; [susulaurentiu@yahoo.com](mailto:susulaurentiu@yahoo.com) (L.S.) [andreea.campu@gmail.com](mailto:andreea.campu@gmail.com) (A.C.); [ana.gabudean@ubbcluj.ro](mailto:ana.gabudean@ubbcluj.ro) (A.M.C) [simion.astilean@phys.ubbcluj.ro](mailto:simion.astilean@phys.ubbcluj.ro) (S.A.)

<sup>2</sup> Biomolecular Physics Department, Faculty of Physics, Babes-Bolyai University, M Kogalniceanu No. 1, Cluj-Napoca 400084, Romania;

<sup>3</sup> Nanostructured Materials and Bio-Nano-Interfaces Center, Interdisciplinary Research Institute on Bio-Nano-Sciences, Babes-Bolyai University, Treboniu Laurian No. 42, Cluj-Napoca 400271, Romania [adriana.vulpoi@phys.ubbcluj.ro](mailto:adriana.vulpoi@phys.ubbcluj.ro) (A.V.)

\* Correspondence: [monica.iosin@phys.ubbcluj.ro](mailto:monica.iosin@phys.ubbcluj.ro) (M.F.); Tel.: +40-264-45-45-54/116

<sup>†</sup> These authors contributed equally to this work

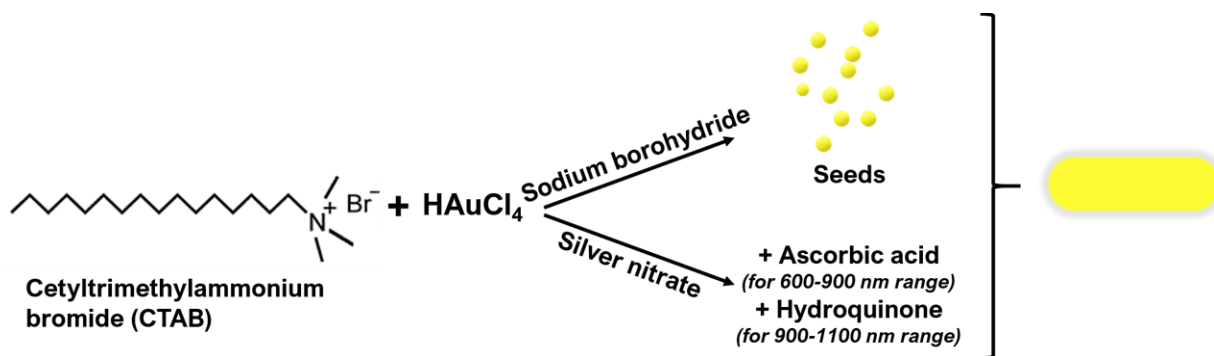

**Figure S1.** Schematic illustration of the seed-mediated method employed for the growth of GNRs.

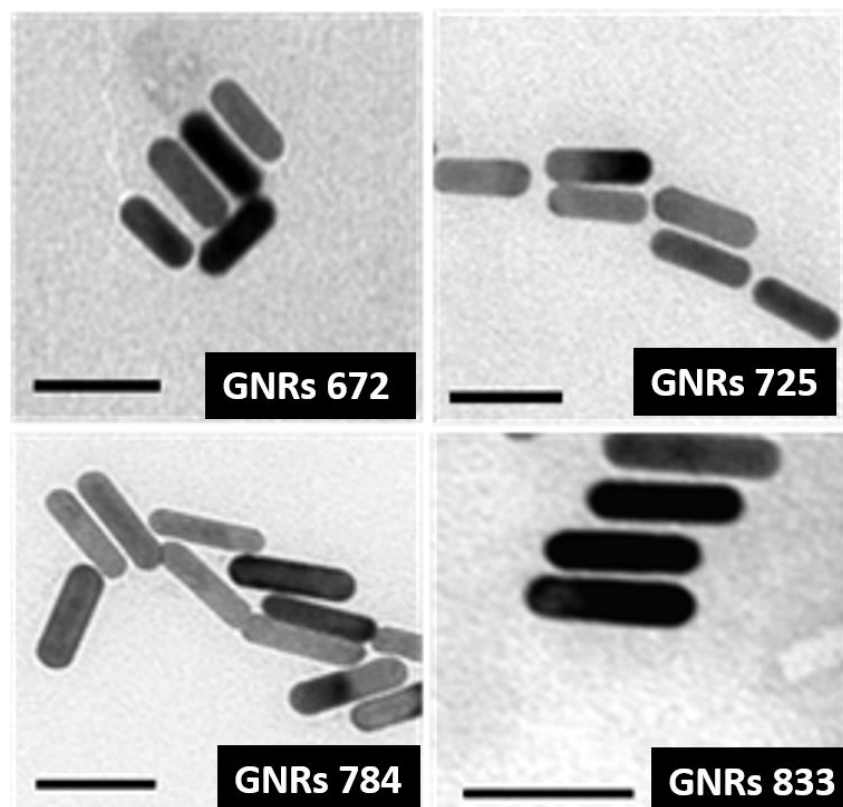

**Figure S2.** Representative TEM images of the selected GNRs with the longitudinal plasmonic band located at 672, 725, 784 and 833 nm, respectively, corresponding to the LSPR spectra presented in Figure 2A.

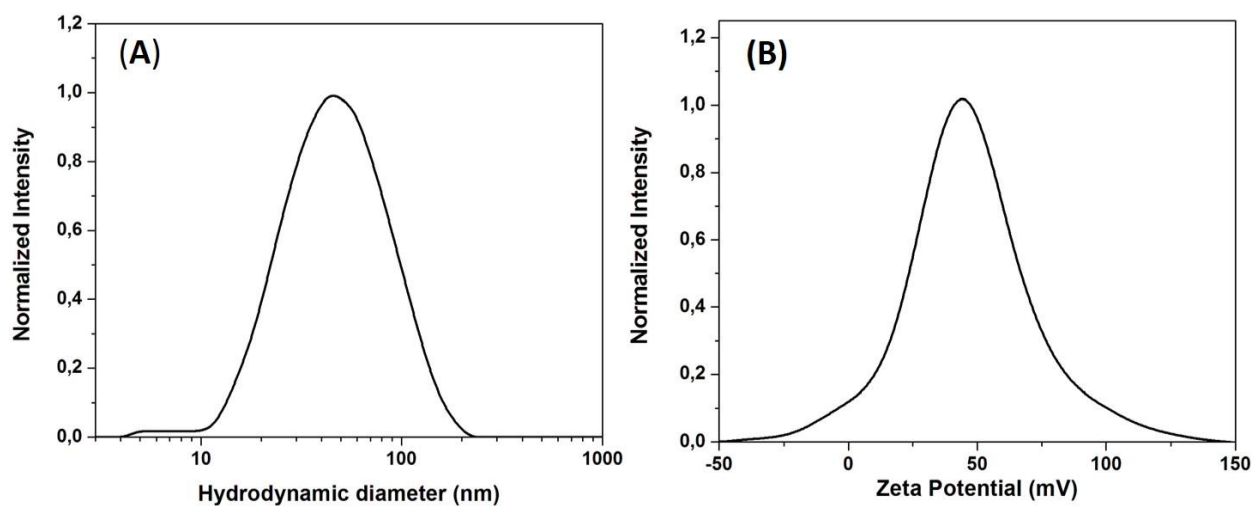

**Figure S3.** (A) DLS and (B) Zeta potential data of the selected GNRs with longitudinal LSPR band at 725 nm.

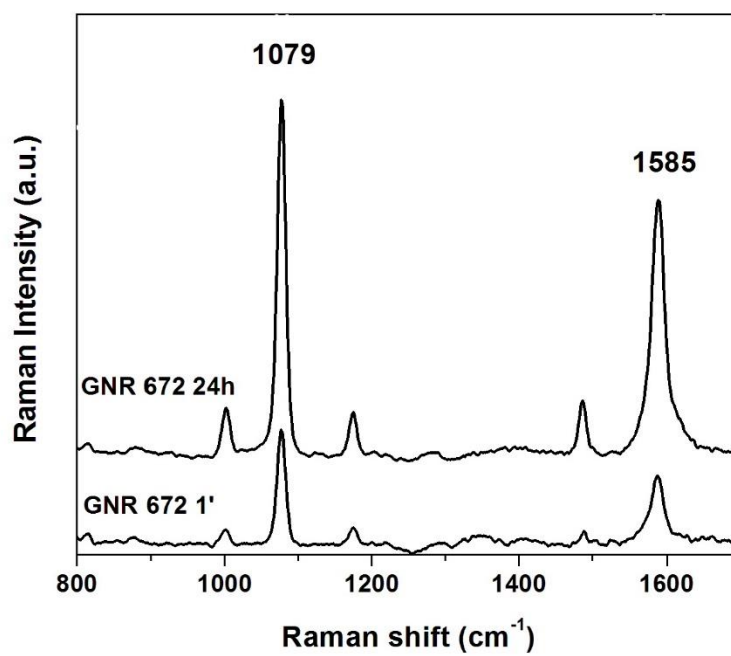

**Figure S4.** Comparison between the SERS spectra of GNRs 672 recorded immediately and after 24 hours of p-ATP grafting.

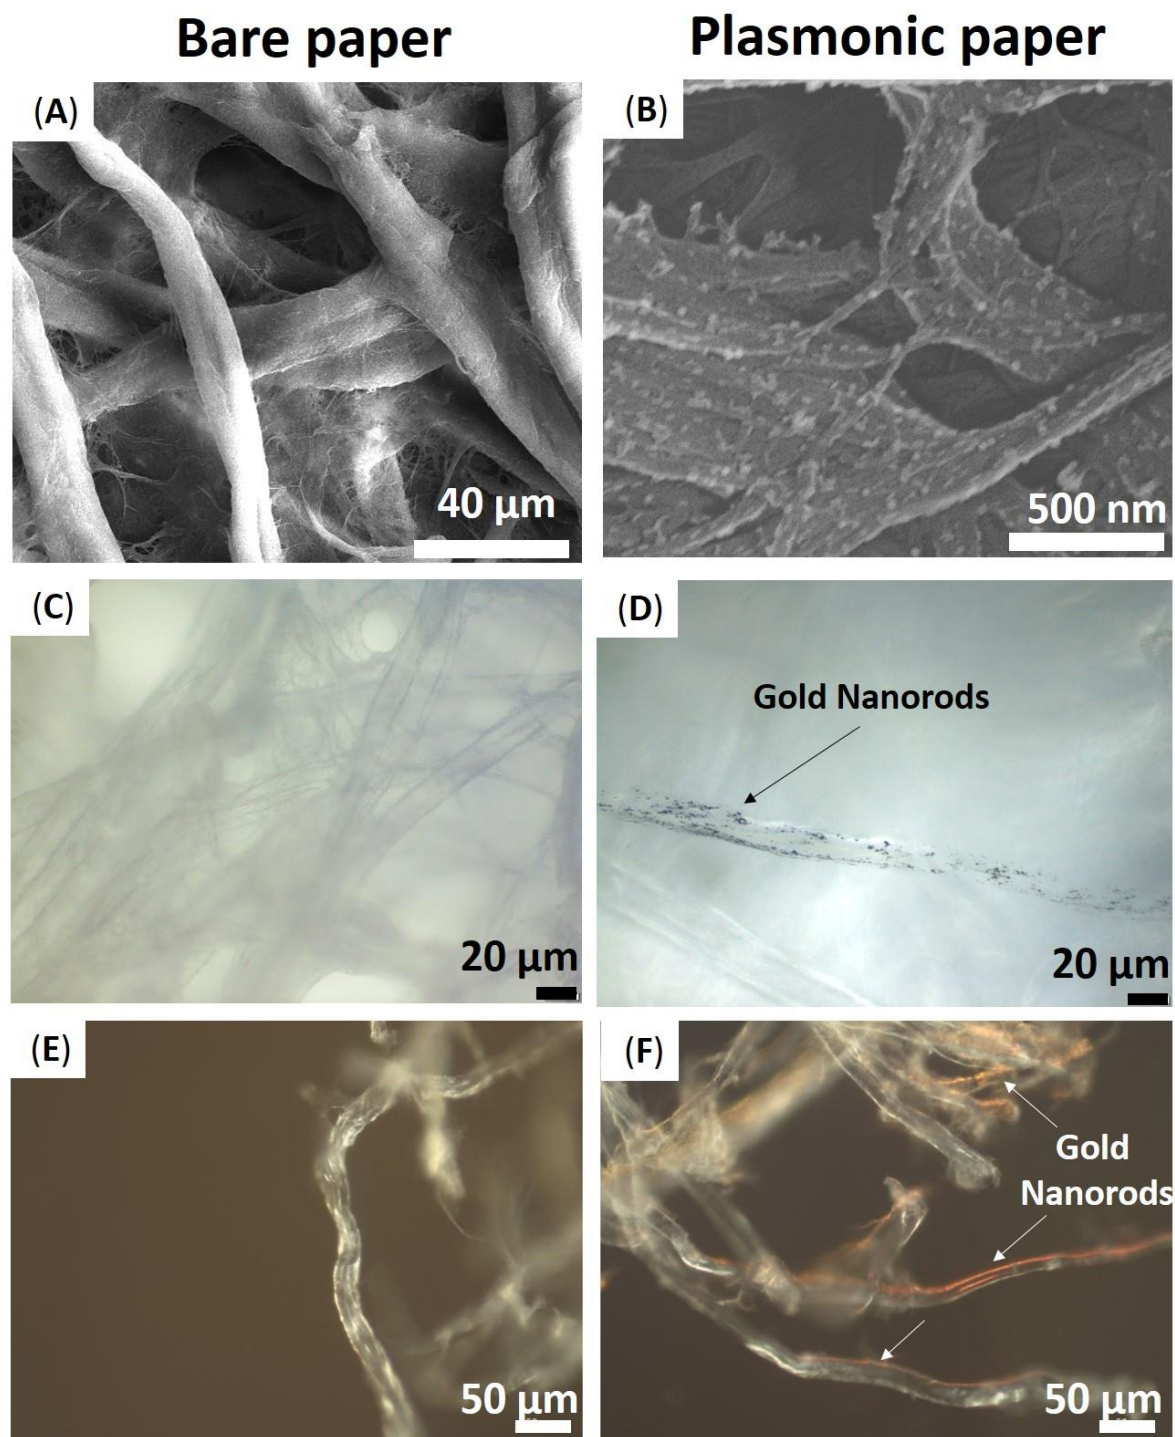

**Figure S5.** Representative (A, B) SEM, (C, D) optical and (E, F) dark-field images of the bare paper platform and paper@GNRs nanoplateforms, respectively; Arrows indicate the GNRs immobilized on the paper fibers.

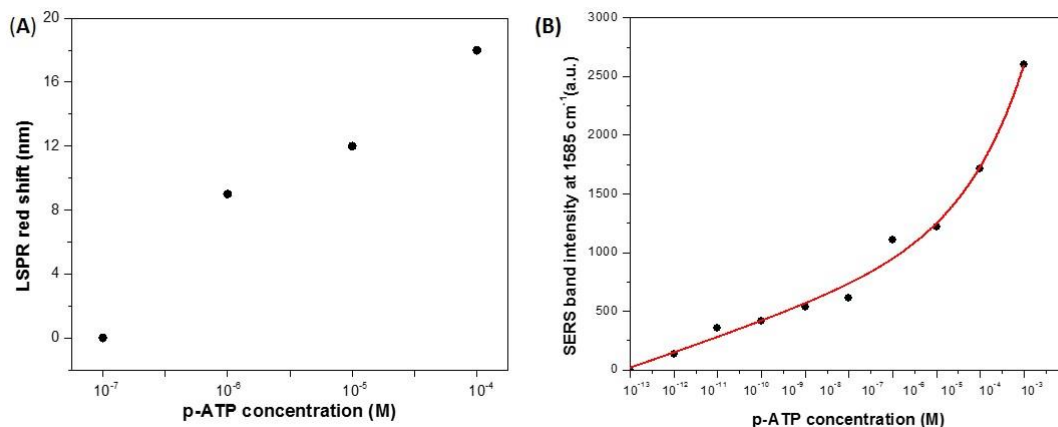

**Figure S6.** LoD determined *via* (A) LSPR by measuring the LSPR shift of the p-ATP grafted paper nanoplatfoms with different concentrations of p-ATP analyte and (B) SERS by measuring the SERS intensity of 1585 cm<sup>-1</sup> band as function of p-ATP concentration onto the optimized plasmonic nanoplatfoms.

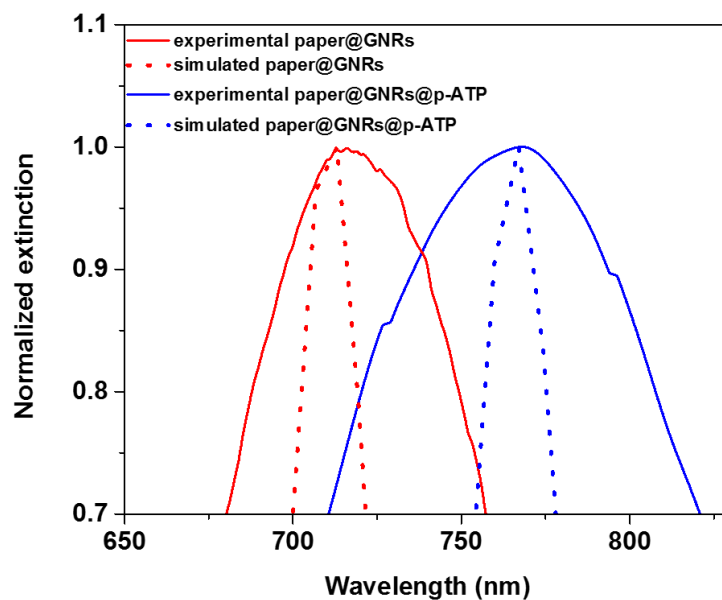

**Figure S7.** Experimental (solid) and FDTD simulated extinction (dotted) spectra obtained from the considered paper-based plasmonic nanoplatfom before (red spectra) and after p-ATP grafting (blue spectra).
